# Supplementary material
Source: MDPI journal article supplement (https://www.mdpi.com/2073-4395/12/7/1605)
Supplement: s1 [file s1]

**Table S1.** ReCiPe 2016 midpoint and endpoint impacts of seed and vegetatively propagated globe artichoke for 1 ton of product and 1 hectare of cropped land.

|                                         |                       | 1 ton of product   |                    | 1 ha of cropped land |                    |
|-----------------------------------------|-----------------------|--------------------|--------------------|----------------------|--------------------|
| LCIA profile midpoint                   | Unit                  | Seed-              | Vegetatively-      | Seed-                | Vegetatively-      |
|                                         |                       | propagated<br>(SP) | propagated<br>(VP) | propagated<br>(SP)   | propagated<br>(VP) |
| Midpoint impacts                        |                       |                    |                    |                      |                    |
| Fine particulate matter formation       | kg PM2.5 eq           | 1.93               | 1.88               | 34.66                | 22.50              |
| Fossil resource scarcity                | kg oil eq             | 166.88             | 107.02             | 3003.81              | 1284.18            |
| Freshwater ecotoxicity                  | kg 1,4-DCB            | 581.49             | 855.3              | 10466.90             | 10263.73           |
| Freshwater eutrophication               | kg P eq               | 0.090              | 0.1                | 1.62                 | 1.05               |
| Global warming                          | kg CO <sub>2</sub> eq | 717.14             | 581.3              | 12908.56             | 6975.98            |
| Human carcinogenic toxicity             | kg 1,4-DCB            | 28.33              | 8.7                | 509.98               | 104.26             |
| Human non - carcinogenic toxicity       | kg 1,4-DCB            | 476.09             | 365.6              | 8569.66              | 4387.41            |
| Ionizing radiation                      | kBq Co-60 eq          | 40.88              | 27.6               | 735.91               | 331.11             |
| Land use                                | m²a crop eq           | 86.10              | 148.4              | 1549.85              | 1781.29            |
| Marine ecotoxicity                      | kg 1,4-DCB            | 887.20             | 1307.7             | 15969.64             | 15692.82           |
| Marine eutrophication                   | kg N eq               | 1.52               | 1.9                | 27.37                | 23.14              |
| Mineral resource scarcity               | kg Cu eq              | 4.69               | 2.9                | 84.46                | 34.62              |
| Ozone formation, Human health           | kg NOx eq             | 2.45               | 2.4                | 44.09                | 28.78              |
| Ozone formation, Terrestrial ecosystems | kg NOx eq             | 5.55               | 5.4                | 99.85                | 64.88              |
| Stratospheric ozone depletion           | kg CFC11 eq           | 0.0054             | 0.0                | 0.10                 | 0.09               |
| Terrestrial acidification               | kg SO <sub>2</sub> eq | 6.60               | 6.9                | 118.86               | 83.20              |
| Terrestrial ecotoxicity                 | kg 1,4-DCB            | 92231.9            | 137393.4           | 1660173.52           | 1648721.18         |
| Water consumption                       | m³                    | 424.33             | 500.1              | 7637.90              | 6001.66            |
| Endpoint impacts                        |                       |                    |                    |                      |                    |
| Human Health                            | DALY                  | 5.63E-03           | 6.38E-03           | 0.10                 | 0.077              |
| Ecosystems                              | species.yr            | 1.98E-05           | 2.39E-05           | 0.00036              | 0.00029            |
| Resources                               | USD2013               | 55.29              | 41.75              | 995.1                | 501.0              |
